# Supplementary material for: Identification of 5 Gene Signatures in Survival Prediction for Patients with Lung Squamous Cell Carcinoma Based on Integrated Multiomics Data Analysis
Source: PubMed Central journal article supplement (PMC7298313; doi:10.1155/2020/6427483), 2020-06-08
Supplement: 6427483.pdf [file 6427483.pdf]

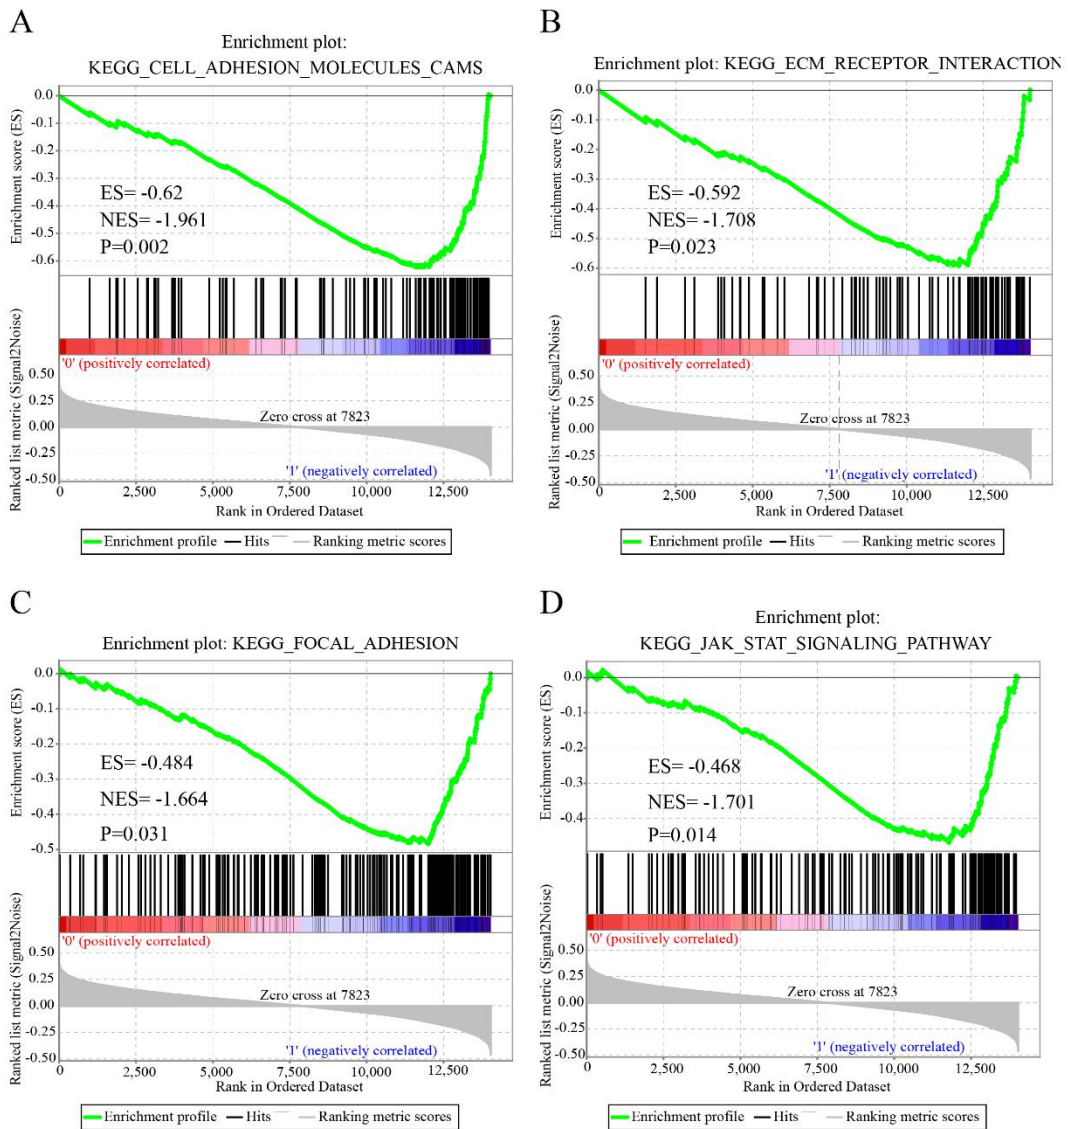

**Figure S1**
